# Supplementary material
Source: PubMed Central journal article supplement (PMC7358162)
Supplement: mmc1.pdf [file mmc1.pdf]

# Psychosocial Aspects of COVID-19

Resize font:

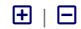

As part of the research study, titled "Psychosocial aspects of the COVID-19 pandemic for neurology housestaff and faculty at an epicenter academic program", we would be grateful if you would consider completing this very brief survey on how the department and the institution have responded to the psychosocial aspects of the COVID-19.

Participation in the study is completely voluntary and responses are anonymous. Whether or not you decide to participate will not affect your employment or academic status, evaluation, relationship with the department and the institution. Completing survey implies consent. The survey is for research purposes and will also help inform our approach to helping members of our department in the COVID-19 pandemic. You and your responses will not be identifiable at any stage of the data collection or analyses. No personal identifiable information will be accessed or collected.

Dr. Leah Croll and her resident colleagues are preparing a paper on this topic, and the summary information (group aggregate data) will be valuable to that effort. Of course, we will share the group data summary with the department once the surveys are complete.

Thank you very much for your consideration, time and effort.

If you do not wish to participate in this survey, please close this form.

**Survey Instructions:** For each item below, please choose the one answer that best describes your experience during the COVID-19 pandemic during the past two months. Please add comments when prompted if desired. Thank you very much.

1) My Role in the NYU Neurology Department:

- HOUSESTAFF  
 FACULTY

[reset](#)

2) I feel increased fear during the COVID-19 pandemic:

- Yes  
 No

[reset](#)

3) I feel increased anxiety during the COVID-19 pandemic:

- Yes  
 No

[reset](#)

4) I feel depressed during the COVID-19 pandemic:

- Yes  
 No

[reset](#)

5) The institution has provided adequate counseling and support services during the COVID-19 pandemic:

- Yes  
 No

[reset](#)

6) Please comment on counseling provided by the institution:

[Expand](#)

7) The department has provided adequate emotional support during the COVID-19 pandemic:

- Yes

No

[reset](#)

8) Please comment on emotional support provided by the department:

[Expand](#)

9) There are additional resources that would be helpful during this COVID-19 pandemic:

Yes

No

[reset](#)

10) Please comment on addition resources that would be helpful during this COVID-19 pandemic:

[Expand](#)

**Submit**
